# Supplementary material
Source: PubMed Central journal article supplement (PMC6930324)
Supplement: NIHMS1048978-supplement-1.pdf [file NIHMS1048978-supplement-1.pdf]

## SUPPLEMENTARY DATA

### **Epstein Barr Virus Nuclear Antigen 1 (EBNA-1) peptide recognized by adult multiple sclerosis patient sera induces neurologic symptoms in a murine model**

Neelakshi R. Jog<sup>a</sup>, Micah T. McClain<sup>a, b, 1</sup>, Latisha D. Heinlen<sup>a</sup>, Timothy Gross<sup>a</sup>, Rheal Towner<sup>c</sup>, Joel M. Guthridge<sup>a, b</sup>, Robert C. Axtell<sup>a</sup>, Gabriel Pardo<sup>a</sup>, John B. Harley<sup>d</sup>, and Judith A. James<sup>a, b</sup>

<sup>a</sup> Arthritis and Clinical Immunology, Oklahoma Medical Research Foundation, Oklahoma City, OK, USA

<sup>b</sup> Departments of Pathology and Medicine, University of Oklahoma Health Sciences Center, Oklahoma City, OK, USA

<sup>c</sup> Advanced Magnetic Resonance Center, Oklahoma Medical Research Foundation, Oklahoma City, OK, USA

<sup>d</sup> Division of Rheumatology, Cincinnati Children's Hospital, Cincinnati, OH, USA; University of Cincinnati College of Medicine, Cincinnati, OH, USA; and Department of Veterans Affairs VA Medical Center, Cincinnati, OH, USA

\* **Correspondence:** Judith A. James, MD, PhD, Oklahoma Medical Research Foundation, 825 N.E. 13th Street, Oklahoma City, Oklahoma 73104, Phone: (405) 271-4987, Fax: (405) 271-7063, Email: Judith-James@omrf.org

**Short title:** EBNA-1 cross-reactivity in multiple sclerosis

#### **Footnote:**

<sup>1</sup>Present address: Division of Infectious Diseases, Duke University School of Medicine, Durham, NC, USA

**Supplementary Table 1.****EBNA411-426 EADYFEYHQEGGPDGE**

| Peptide Number | Peptide sequence | EBNA-1 amino acid region | % patients with binding |      |        |
|----------------|------------------|--------------------------|-------------------------|------|--------|
|                |                  |                          | No IFN                  | IFN  | MS pts |
| 200            | PPGRRPFFHP       | 398-408                  | 8.3                     | 27.3 | 17.4   |
| 201            | GRRPFFHPVG       | 401-410                  | 8.3                     | 9.1  | 8.7    |
| 202            | RPFHPVGEA        | 403-412                  | 16.7                    | 9.1  | 13.0   |
| 203            | FFHPVGEADY       | 405-414                  | 25.0                    | 9.1  | 17.4   |
| 204            | HPVGEADYFE       | 407-416                  | 66.7                    | 66.7 | 69.6   |
| 205            | VGEADYFEYH       | 409-418                  | 58.3                    | 27.3 | 43.5   |
| 206            | EADYFEYHQE       | 411-420                  | 50.0                    | 45.5 | 47.8   |
| 207            | DYFEYHQEGG       | 413-422                  | 25.0                    | 18.2 | 21.7   |
| 208            | FEYHQEGGPD       | 415-424                  | 41.7                    | 18.2 | 30.4   |
| 209            | YHQEGGPDGE       | 417-426                  | 33.3                    | 0.0  | 17.4   |
| 210            | QEGGPDGEPD       | 419-428                  | 58.3                    | 36.4 | 47.8   |
| 211            | GGPDGEPDVP       | 421-430                  | 66.7                    | 27.3 | 47.8   |
| 212            | PDGEPDVPPG       | 423-432                  | 16.7                    | 9.1  | 13.0   |
| 213            | GEPDVPPGAI       | 425-434                  | 25.0                    | 9.1  | 17.4   |

Decapeptides overlapping sequential peptide by eight amino acids spanning the EBNA-1 protein were constructed according to the primary amino acid sequence using solid phase peptide chemistry. The EBNA411-426 regions are highlighted in the sequential peptides in red. Anti-peptide assays were conducted with patient or control sera by a modified ELISA. The cutoff for each peptide binding was defined as the mean OD of the specific peptide in controls + (2\*Standard deviation of the peptide in controls). Percent of MS patients not on IFN therapy (No IFN), percent of MS patients on IFN therapy (IFN), and percent of total MS patients (MS pts) that bound each peptide are shown.

## Supplementary Figure S1

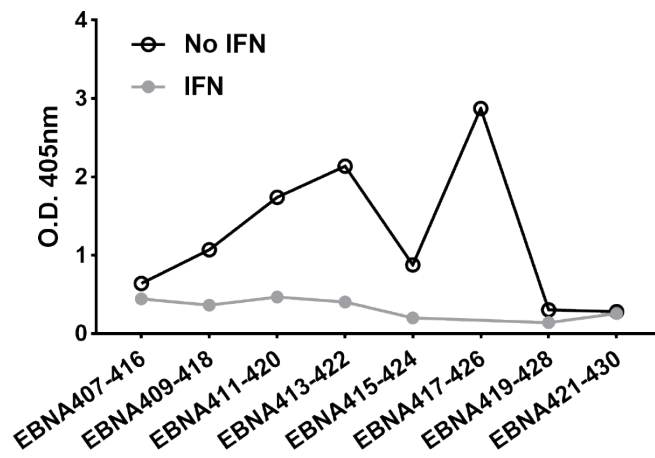

**MS patients not on IFN therapy showed increased binding to amino acid region 411-422 and 417-426.** The mean OD values for each peptide in patients that showed reactivity towards the peptide are presented. The reactivity towards each peptide was defined as in Table 1.

## Supplementary Figure S2

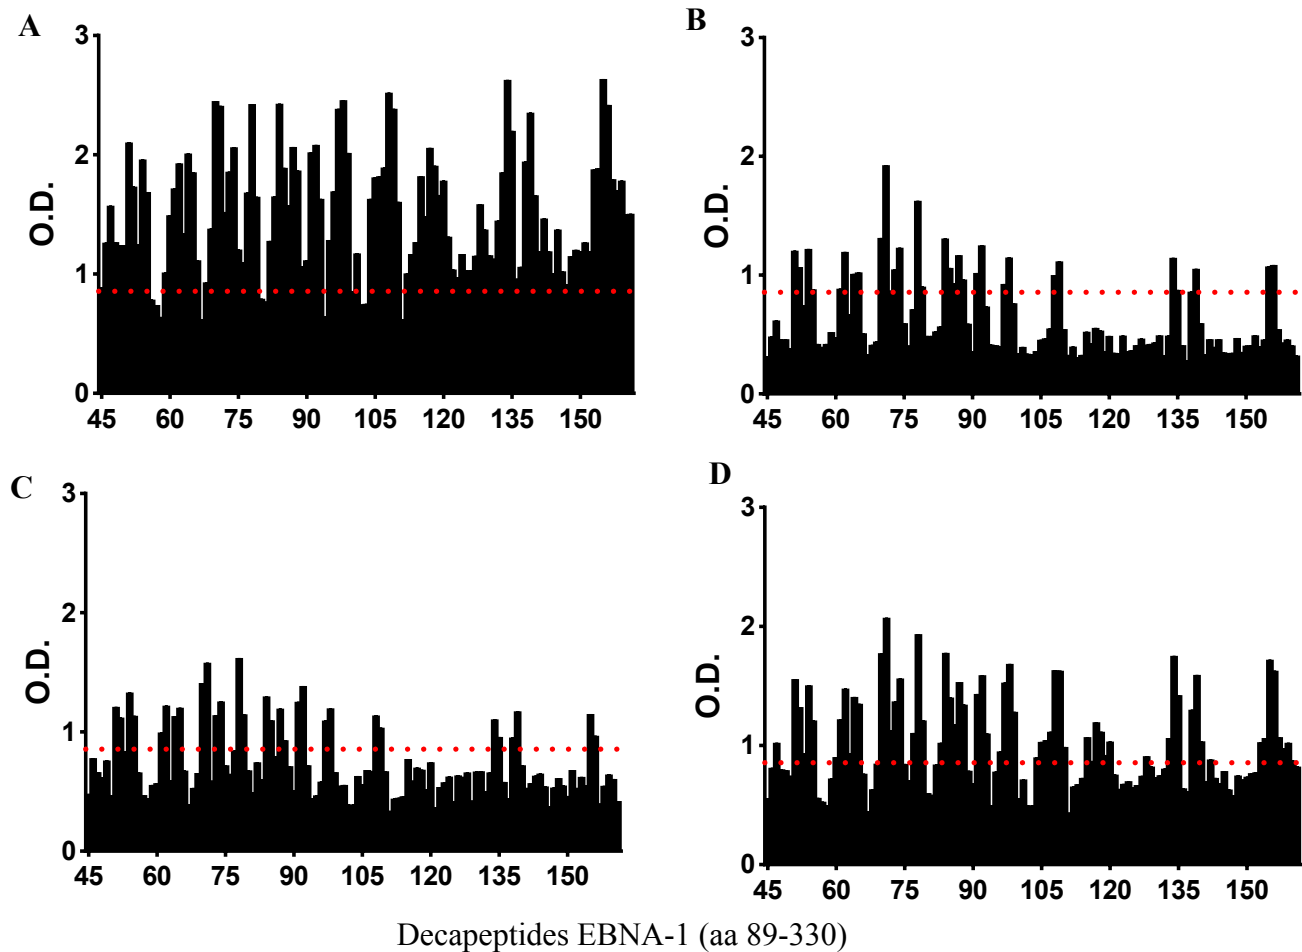

**Binding to glycine-alanine rich regions of EBNA-1** Average binding profiles of the untreated MS patients (A), MS patients treated with interferon  $\beta$  (B), healthy controls (C), all MS patients together (D) against unique overlapping decapeptides of EBNA-1 spanning the amino acid region 89-330 were determined using solid-phase ELISAs. Positive cutoff (dotted line) was defined as mean plus twice the standard deviation (SD) of healthy controls. The overlapping decapeptides are numbered from 45-161.

### Supplementary Figure S3

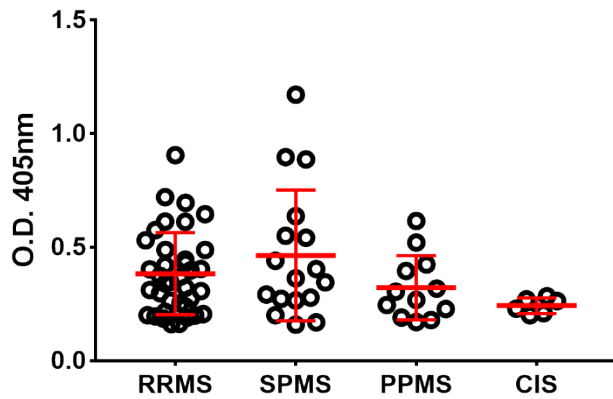

**Patients with MS tend to have higher IgG towards EBNA411-426 compared to CIS.**

Reactivity towards EBNA411-426 in MS patients was determined by ELISA as described in Methods. RRMS, relapsing remitting MS, SPMS, secondary progressive MS, PPMS, primary progressive MS, CIS, clinically isolated syndrome. Mean $\pm$ SD are shown.
